# Supplementary material for: Cardiac Progenitor Cells and Adipocyte Stem Cells from Same Patients Exhibit In Vitro Functional Differences
Source: MDPI journal article supplement (doi:10.3390/ijms23105588), 2022-05-17
Supplement: s1 [file s1]

## Supplementary Materials

**Figure S1: Light microscopy images of explanted cells**

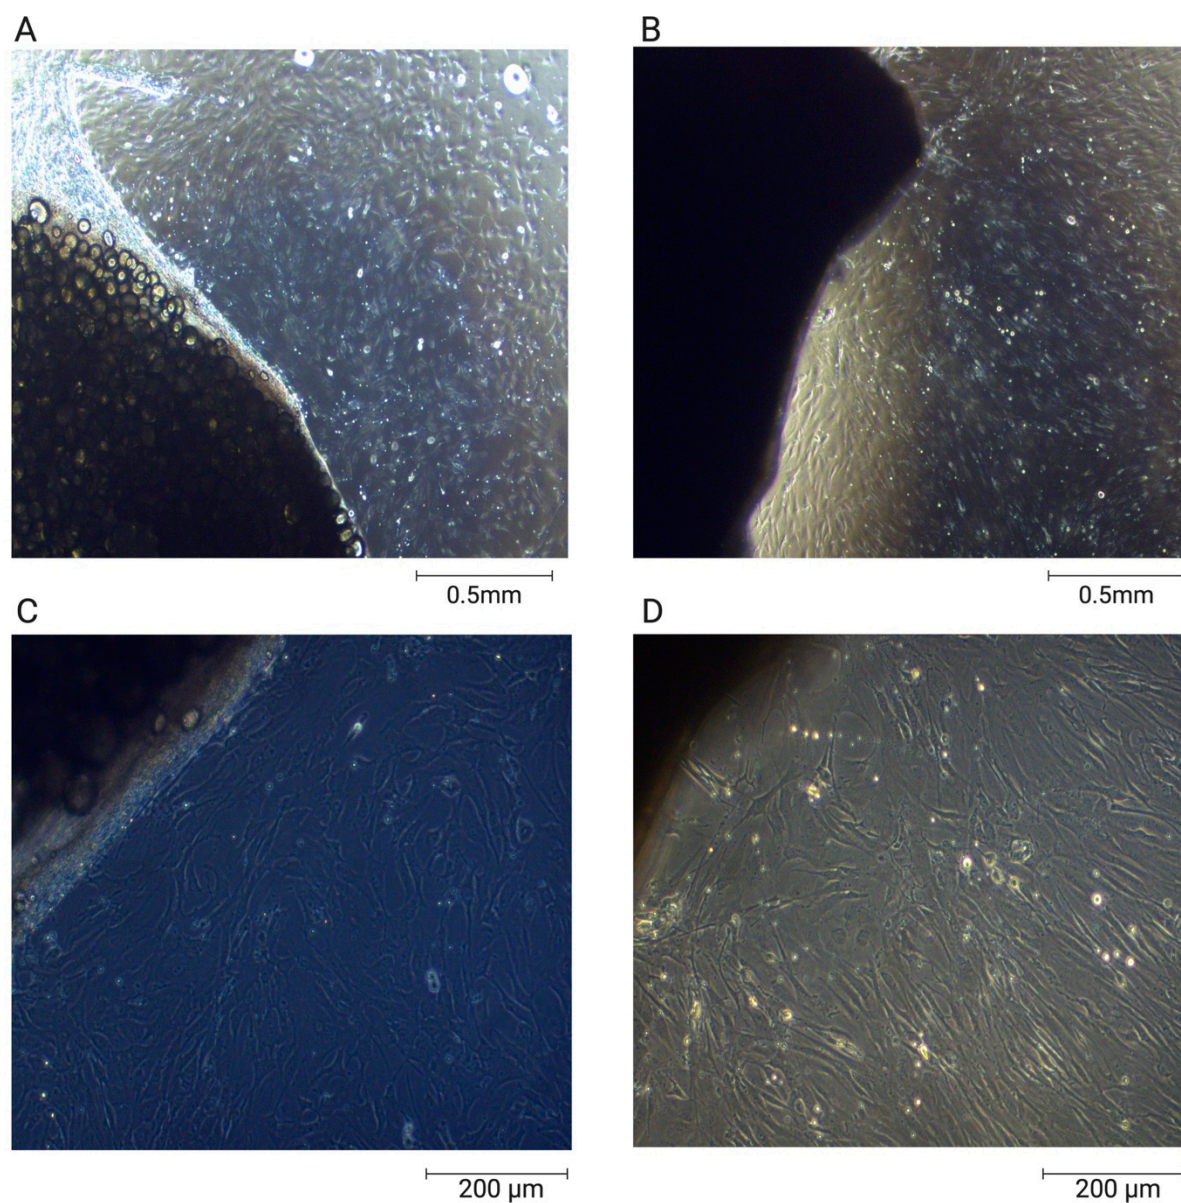

**Figure S1: Light microscopy images of explanted cells.**

Image showing cells explanted from epicardial adipose tissue (**A&C**) and from right atrial appendage (**B&D**). Inset red squares show a part of the image at higher magnification. Images **A&B** were taken at 40X magnification and **C&D** at 100X magnification.

**Supplemental Figure 2**

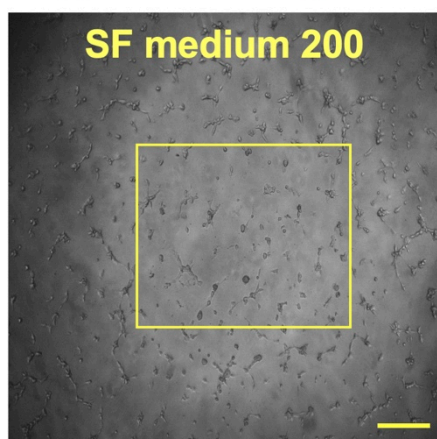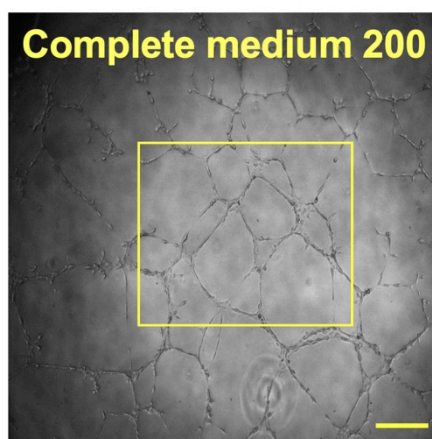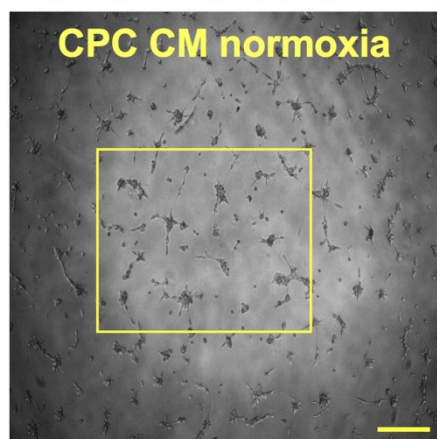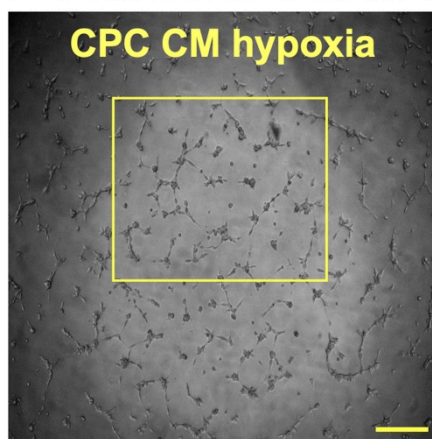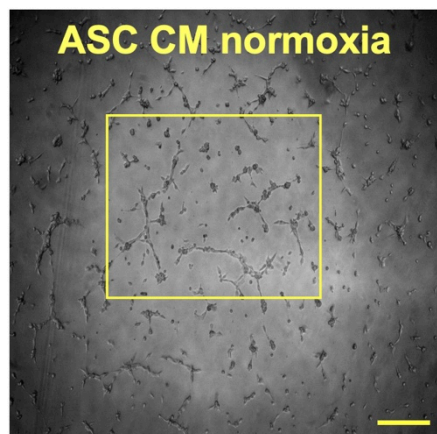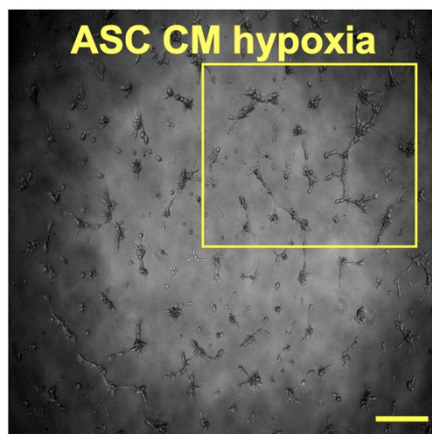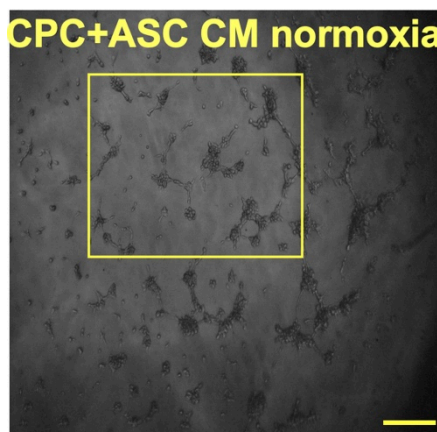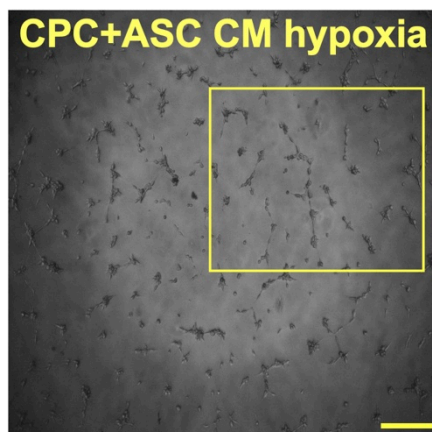

### Figure S2: Tube formation assay

Representative full images captured at 40X magnification, showing network formation by HUVECs with or without CM from CPCs and ASCs. Complete medium 200 group is the positive control, while serum free (SF) medium 200 group is the negative control. Boxed area in each image is zoomed in the main manuscript. Scale bars are 500  $\mu\text{m}$ .

**Table S1: Table showing relevant fluorescent light (FL) channels and the corresponding fluorophores.**

| FL Channel | Fluorophore | Conjugated cell marker(s) | Excitation wavelength (nm) | Emission wavelength (nm) |
|------------|-------------|---------------------------|----------------------------|--------------------------|
| FL1        | FITC        | CD34/CD29                 | 488                        | 525/40 BP                |
| FL2        | PE          | CD105                     | 488                        | 575/25 BP                |
| FL5        | PE-Cy7      | CD73                      | 488                        | 755 LP                   |
| FL6        | APC         | CD90                      | 640                        | 660/20 BP                |
| FL10       | ZY          | Viability                 | 405                        | 550/40 BP                |

FL, fluorescent light; BP, band pass; LP, long pass
